# Supplementary material for: SnS nanoparticles electrostatically anchored on three-dimensional N-doped graphene as an active and durable anode for sodium-ion batteries
Source: Royal Society of Chemistry journal article supplement (doi:10.1039/c7ee01628j), 2017-01-01
Supplement: c7ee01628j1.pdf [file c7ee01628j1.pdf]

## Electronic Supplementary Information (ESI)

# SnS Nanoparticles Electrostatically Anchored on Three-dimensional N-doped Graphene as an Active and Durable Anode for Sodium Ion Batteries

Xunhui Xiong,<sup>a</sup> Chenghao Yang,<sup>\*a</sup> Guanhua Wang,<sup>a</sup> Yuwei Lin,<sup>b</sup> Xing Ou,<sup>a</sup> Jeng-Han Wang,<sup>b</sup> Bote Zhao,<sup>c</sup> Meilin Liu,<sup>c</sup> Zhang Lin<sup>a</sup> and Kevin Huang<sup>\*d</sup>

<sup>a</sup> Guangzhou Key Laboratory of Surface Chemistry of Energy Materials, New Energy Research Institute, School of Environment and Energy, South China University of Technology, Guangzhou 510006, China.

E-mail: esyangc@scut.edu.cn; Tel: +86-803-39381203

<sup>b</sup> Department of Chemistry, National Taiwan Normal University, Taipei, Taiwan 11677.

<sup>c</sup> School of Materials Science & Engineering, Georgia Institute of Technology, Atlanta, GA 30332-0245, USA.

<sup>d</sup> Department of Mechanical Engineering, University of South Carolina, Columbia, SC 29205, USA  
E-mail: huang46@cec.sc.edu

## Experimental methods

*Materials synthesis:* All the reagents used in the experiment were of analytical grade purity and used as received. Graphite oxide (GO) was prepared from graphite powder according to a modified Hummers' method. The as-obtained aqueous suspension of GO was diluted with deionized water under ultrasonication for 6 h to obtain an exfoliated graphene oxide (GO) suspension ( $\sim 2 \text{ mg mL}^{-1}$ ). The functionalization of GO with PDDA was achieved as follows: 50 ml of GO solution was loaded into a round-bottom flask, followed by adding 10 mL of PDDA solution (1 wt %) and sonication for 1 h until no visible particulate. At the same time, 0.55 g of commercial SnS<sub>2</sub> was added to a 20 mL of (NH<sub>4</sub>)<sub>2</sub>S solution under magnetic stirring until a clear and yellow solution was obtained. Then the yellow solution, PDDA

functionalized GO solution and dicyandiamide powders were mixed together by magnetic stirring and sonicated for another 1 h. The resultant dispersion was then frozen using liquid nitrogen, and subjected to a vacuum drying process for 24 h. Finally, the obtained porous powder was heated at 600 °C for 2 h under Ar atmosphere to yield SnS/3DNG hybrid. The SnS/3DG hybrid with the same content of graphene with SnS/3DNG and pure SnS were obtained from a similar process but without adding dicyandiamide powders or PDDA functionalized GO solution, respectively. The 3DNG was prepared by mixing PDDA functionalized GO solution and dicyandiamide powders, followed by freeze-drying and calcining. The  $\text{Na}_3\text{V}_2(\text{PO}_4)_3/\text{C}$  hybrid cathode was prepared by a method reported previously.<sup>[23]</sup>

*Materials characterization:* The Zeta potentials of GO and GO-PDDA suspensions were measured using a Zetasizer 3000HS (Malvern Instruments). The X-ray diffraction (XRD) patterns of samples were collected from a Rigaku D/max 2500 using  $\text{Cu K}\alpha$  radiation. Morphologies of prepared powders were investigated by a field-emission scanning electron microscopy (FESEM, Hitachi S-4800) and a transmission electron microscopy (TEM) and high resolution TEM (HRTEM) (TEM, JEM-2010, JEOL, 200 kV). Prior to TEM analysis, powders were ultrasonically dispersed in ethanol for 15 minutes. Surface characterization of elemental electronic states was examined by X-ray photoelectron spectroscopy (XPS, Thermo K-Alpha XPS spectrometer, Thermo Fisher Scientific) equipped with a monochromatic  $\text{Al-K}\alpha$  X-ray source ( $h\nu = 1468.6$  eV). Raman spectroscopy was performed using a Renishaw RM1000 equipped with a He-Ne laser at an excitation wavelength of 633 nm (Thorlab

HRP-170) through a 20x/0.40 objective. The BET-specific surface areas were obtained from nitrogen adsorption–desorption isotherm at the boiling point of liquid nitrogen (77 K) using a Micromeritics ASAP 2020 analyzer.

*Electrochemical tests:* Coin-type half-cells were assembled in an Ar glove box to investigate the sodiation/desodiation behaviors of the prepared anodes. A homogenous slurry was obtained by mixing the as-prepared powders with super P and carboxymethyl cellulose (70:15:15 in weight) in deionized water, followed by coating it on a copper foil and dried at 100°C under vacuum for 12 h. The typical thickness of the electrode is ~30  $\mu\text{m}$  with a packing density of about 1.1~1.3  $\text{g cm}^{-3}$ . The tailored Cu foil coated with active materials was used as work electrode with metallic sodium as the counter electrode, and glass fiber as the separator in a half-cell configuration. The electrolyte was a solution of 1 M  $\text{NaClO}_4$  in propylene carbonate (PC) with 5% fluoroethylene carbonate (FEC) additive. Galvanostatic charge and discharge cycles were carried out using LAND CT2001A battery testing system (Wuhan, China) within a voltage range of 0.01-2.5 V based on the weight of the composite. Cyclic voltammetry (CV) measurements were made using IM6 electrochemical testing station running at 0.1  $\text{mV s}^{-1}$  from the open circuit potential to 0.01 V and then back to 2.5 V.

### **Computational method**

The density functional theory (DFT) calculations were performed by Vienna *Ab initio* Simulation Package (VASP).<sup>[24]</sup> The computational method employed generalized gradient approximation (GGA) with Perdew-Wang 1991 formulation (PW91) for the exchange-correlation function.<sup>[25]</sup> The valence electrons were expanded

by plane-wave basis with the cutoff energy at 600 eV to simulate the periodicity of the system and the core electrons were mimicked by the cost-effective pseudopotentials with projector-augmented wave method (PAW).<sup>[26]</sup> The Brillouin-Zone (BZ) integration was sampled by the Monkhorst-Pack scheme<sup>[27]</sup> with the sampling k-point at  $0.05 \times 2$  ( $1/\text{\AA}$ ) interval in the reciprocal space. The spin-polarization was applied for all the calculations. The graphene sheet was modeled by a  $5 \times 5$  supercell, while the nitrogen doped graphene was a thiophene-like structure by replacing one carbon to nitrogen atoms. All the atoms were fully relaxed during the calculation. The structural optimization and energetic calculation were carried out by the quasi-Newton method with an energetic convergence of  $1 \times 10^{-4}$  eV and gradient convergence of  $1 \times 10^{-2}$  eV. The Van der Waal correction conducted by DFT-D2 method of Grimme<sup>[28]</sup> was employed for the adsorption energy calculation.

Table S1 Zeta potentials (five measurements) of GO and PDDA-GO.

|         | 1     | 2     | 3     | 4     | 5     | Average |
|---------|-------|-------|-------|-------|-------|---------|
| GO      | -34.0 | -33.8 | -34.0 | -34.3 | -34.4 | -34.1   |
| PDDA-GO | 60.9  | 61.3  | 61.5  | 61.6  | 61.2  | 61.3    |

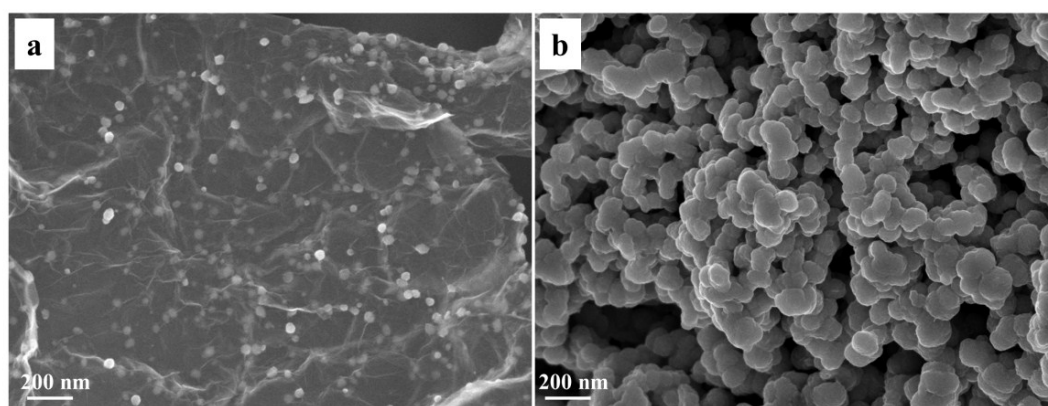

Figure S1 SEM images of (a) SnS/3DNG and (b) pure SnS prepared with similar method.

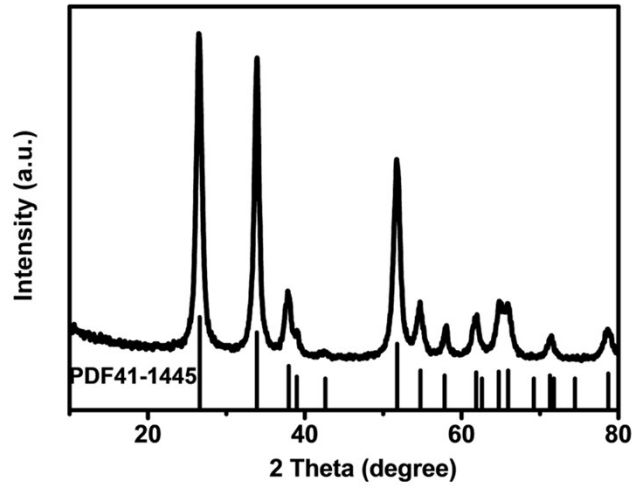

Figure S2 XRD patterns of powders obtained by calcining SnS/3DNG in air to 800 °C.

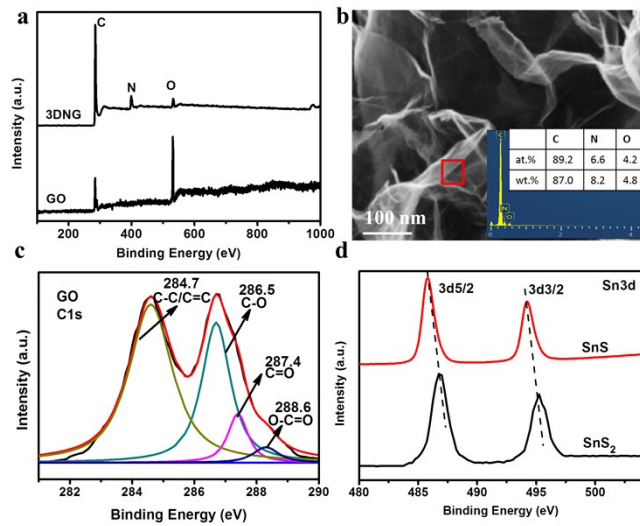

Figure S3 (a) Survey XPS spectra of GO and SnS; (b) TEM image of 3DNG and EDS analysis of the selected area; (c) high-resolution XPS spectra of C 1s GO; (d) high-resolution XPS spectra of Sn 3d in SnS and SnS<sub>2</sub>.

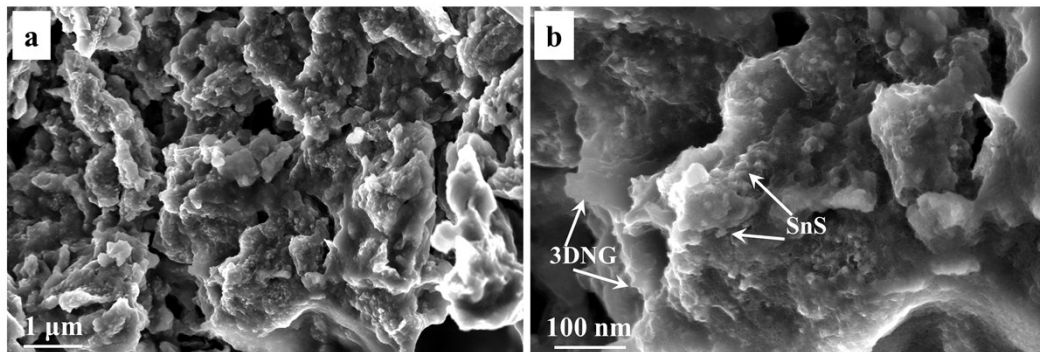

Figure S4 SEM images of SnS/N-doped graphene hybrid obtained by air drying method showing dense agglomerates.

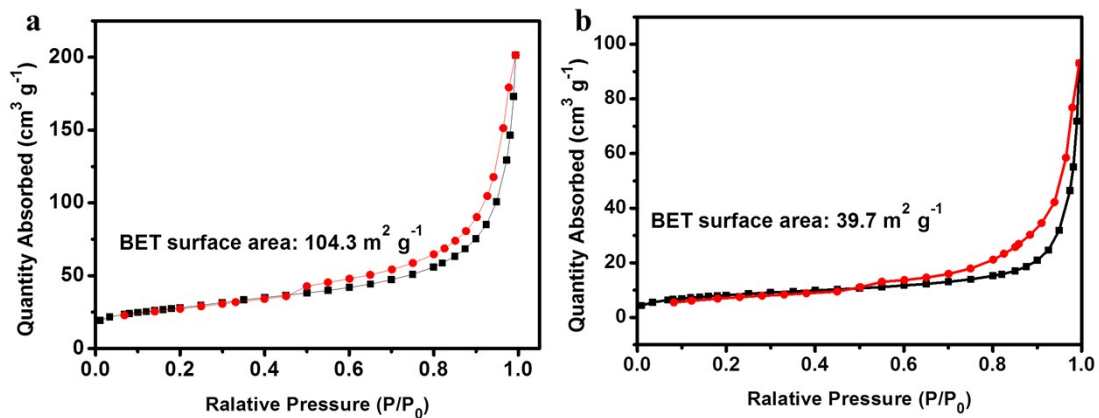

Figure S5 N<sub>2</sub> isotherms and calculated BET specific surface area of SnS/N-doped graphene: (a) freeze drying and (b) drying in air.

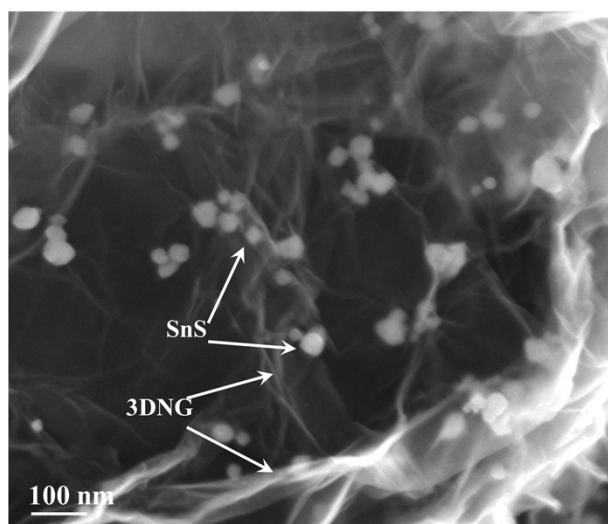

Figure S6 SEM image of SnS/3DNG showing agglomerated SnS nanoparticles on both sides of 3DNG.

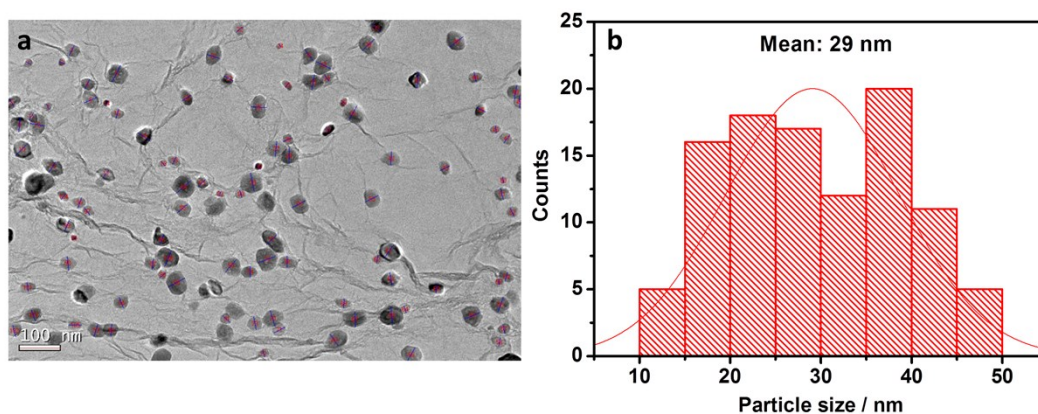

Figure S7 The particle size distribution of SnS on 3DNG.

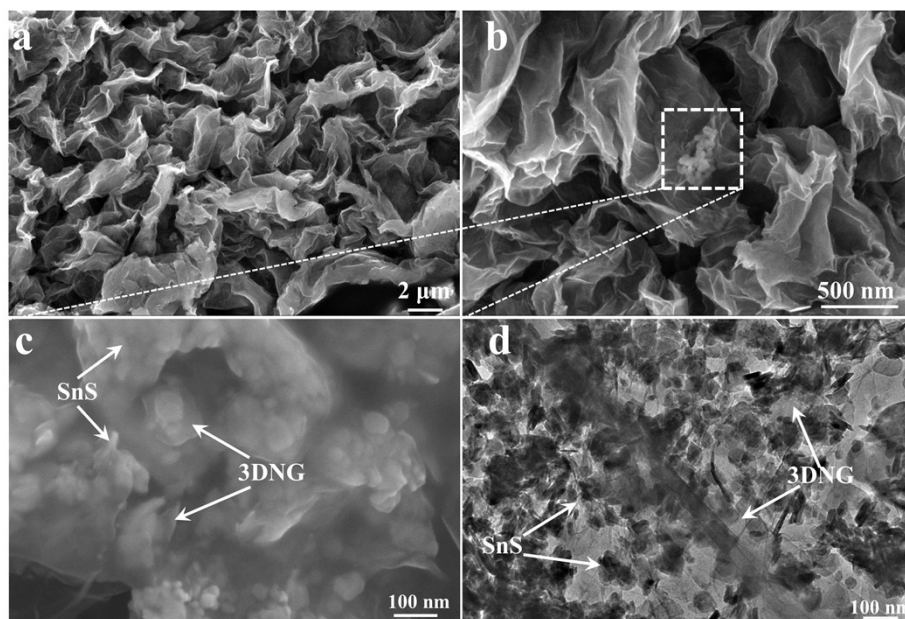

Figure S8 (a)-(b) SEM image (showing SnS unevenly distributed on graphene) and (c)-(d) TEM image of SnS/3DNG using unfunctionalized GO (graphene content in the hybrid is about 8.0 wt %), showing the SnS NPs are heavily agglomerated.

Table S2 Alloying reaction for the sodium-tin system in the ranges of 0.01-0.45V

| Reaction                                                                   | Voltage range (V, vs. Na <sup>+</sup> /Na) |
|----------------------------------------------------------------------------|--------------------------------------------|
| $\text{Sn} + \text{Na} \rightarrow \text{Na}_x\text{Sn}$                   | 0.41-0.45                                  |
| $\text{Na}_x\text{Sn} + \text{Na} \rightarrow \alpha\text{-NaSn}_2$        | 0.15-0.18                                  |
| $\alpha\text{-NaSn}_2 + \text{Na} \rightarrow \text{Na}_9\text{Sn}_4$      | 0.06-0.08                                  |
| $\text{Na}_9\text{Sn}_4 + \text{Na} \rightarrow \text{Na}_{15}\text{Sn}_4$ | 0.01-0.03                                  |



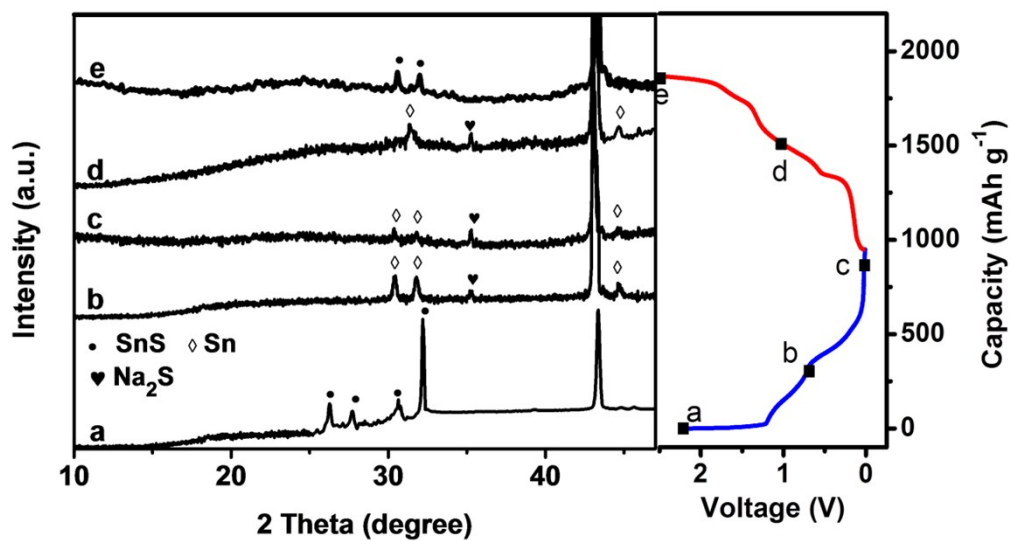

Figure S9 Ex situ XRD patterns of the SnS/3DNG anode collected at various states as indicated in the corresponding voltage profile: (a) fresh state; (b) after the first discharge to 0.8 V; (c) after the first discharge to 0.05 V; (d) after the first charge to 1.0 V, and (e) after the first charge to 2.4 V.

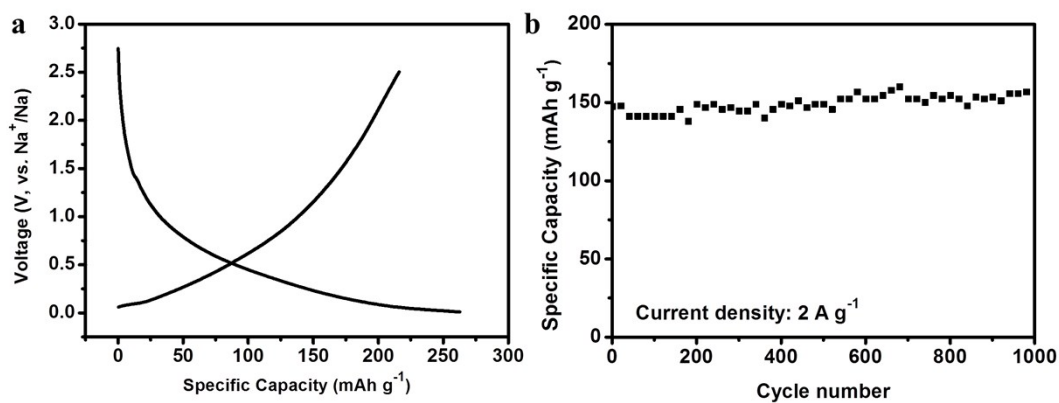

Figure S10 (a) The second charge-discharge curves of 3DNG at  $100 \text{ mA g}^{-1}$  and (b) the cycle performance at  $2 \text{ A g}^{-1}$ .



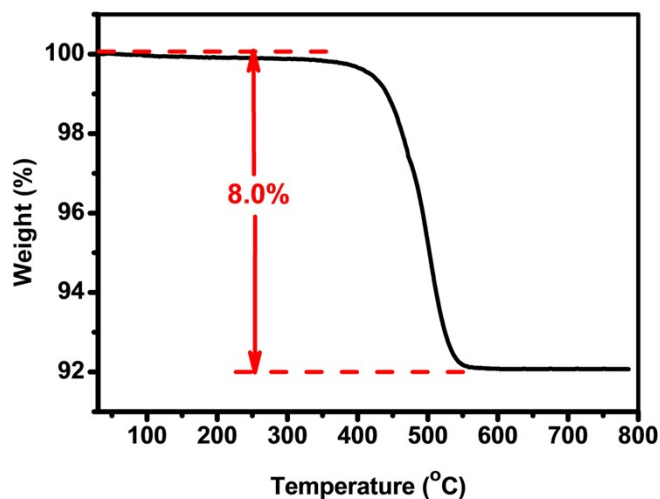

Figure S11 TG curve of the SnS/3DNG hybrid in air with a heating rate of  $2\text{ }^{\circ}\text{C min}^{-1}$  and air flow of  $100\text{ mL min}^{-1}$ .

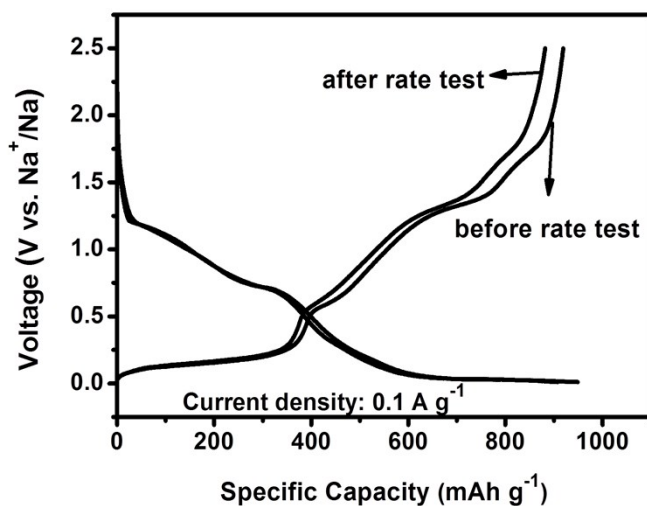

Figure S12 Comparison of the initial and after-rate-test charge-discharge profiles of SnS/3DNG anode at  $0.1\text{ A g}^{-1}$ .

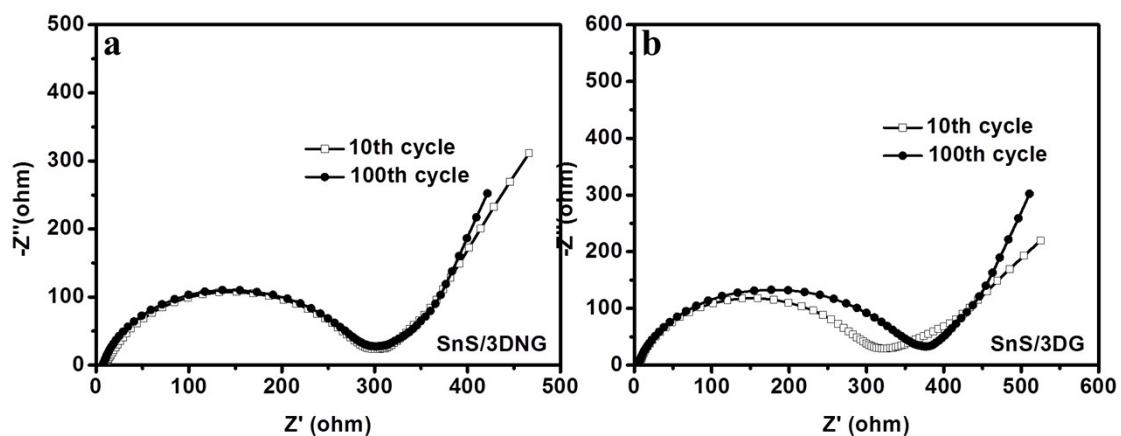

Figure S13 Nyquist plots of (a) SnS/3DNG and (b) SnS/3DG after different cycles at  $0.1\text{ A g}^{-1}$  in a fully sodiation state ( $0.01\text{ V}$ ) from  $1\text{ MHz}$  to  $10\text{ mHz}$ .

Table S3 Comparison of cycling performance of SnS/3DNG with previously reported Sn-based anodes for SIB

|          | <b>Materials</b>                                | <b>Capacity</b>                                                    | <b>Retention</b> | <b>Reference</b>                            |
|----------|-------------------------------------------------|--------------------------------------------------------------------|------------------|---------------------------------------------|
| Ref. S1  | SnS/graphene                                    | 308 mAh g <sup>-1</sup> after 300 cycles at 7.29 A g <sup>-1</sup> | 88%              | ACS Nano 2014, 8: 8323                      |
| Ref. S2  | SnS Nano-honeycomb /graphene foam               | 1010 mAh g <sup>-1</sup> after 200 cycles at 0.1 A g <sup>-1</sup> | 88.1%            | Nat. Comm.2016, 7, 12122                    |
| Ref. S3  | SnS <sub>2</sub> -RGO                           | 500 mAh g <sup>-1</sup> after 400 cycles at 1 A g <sup>-1</sup>    | 84%              | Adv. Mater. 2014, 26: 3854                  |
| Ref. S4  | SnS <sub>2</sub> /rGO                           | 300 mAh g <sup>-1</sup> after 1000 cycles at 0.8 A g <sup>-1</sup> | 61%              | Adv. Funct. Mater. 2015, 25: 481            |
| Ref. S5  | SnS <sub>2</sub> /amino-Functionalized graphene | 480 mAh g <sup>-1</sup> after 1000 cycles at 1 A g <sup>-1</sup>   | 85%              | <i>Energy Environ. Sci.</i> 2016, 9: 1430   |
| Ref. S6  | 3D SnS/C                                        | 535 mAh g <sup>-1</sup> after 300 cycles at 1 A g <sup>-1</sup>    | 80%              | <i>Adv. Sci.</i> 2015, 2, 1500200           |
| Ref. S7  | C@SnS/SnO <sub>2</sub> @graphene                | 360 mAh g <sup>-1</sup> after 500 cycles at 2.43 A g <sup>-1</sup> | 76%              | <i>Angew. Chem. Int. Ed.</i> 2016, 55: 3408 |
| Ref. S8  | SnS-C                                           | 433 mAh g <sup>-1</sup> after 50 cycles at 0.5 A g <sup>-1</sup>   | 89%              | Nano Research 2015, 8: 1595                 |
| Ref. S9  | SnS-C                                           | 548 mAh g <sup>-1</sup> after 80 cycles at 0.1 A g <sup>-1</sup>   | 97%              | J. Mater. Chem. A 2014, 2: 16424            |
| Ref. S10 | SnS@RGO                                         | 386 mAh g <sup>-1</sup> after 100 cycles at 0.1 A g <sup>-1</sup>  | 94%              | J. Power Sources 2015, 293: 784             |
| Ref. S11 | exfoliated-SnS <sub>2</sub> /graphene           | 610 mA h g <sup>-1</sup> after 300 cycles at 0.2 A g <sup>-1</sup> | 100%             | Nanoscale 2015, 7: 1325                     |
| Ref. S12 | SnO <sub>2</sub> -RGO                           | 330 mA h g <sup>-1</sup> after 150 cycles at 0.1 A g <sup>-1</sup> | 81.3%            | J. Mater. Chem. A 2014, 2: 529              |
| Ref. S13 | 8-Sn@C                                          | 415 mAh g <sup>-1</sup> after 500 cycles at 1 A g <sup>-1</sup>    | 97.6%            | Adv. Func. Mater. 2015, 25: 214             |
|          | SnS/3DNG                                        | 509.9 mAh g <sup>-1</sup> after 1000 cycles at 2 A g <sup>-1</sup> | 87.1%            | Our work                                    |

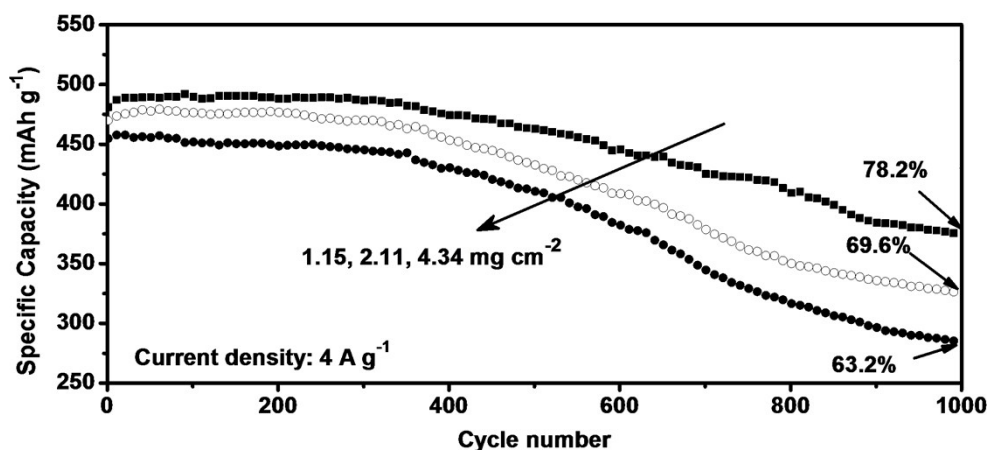

Figure S14 The capacities of the SnS/3DNG electrode with different active materials loading at 4 A g<sup>-1</sup>.

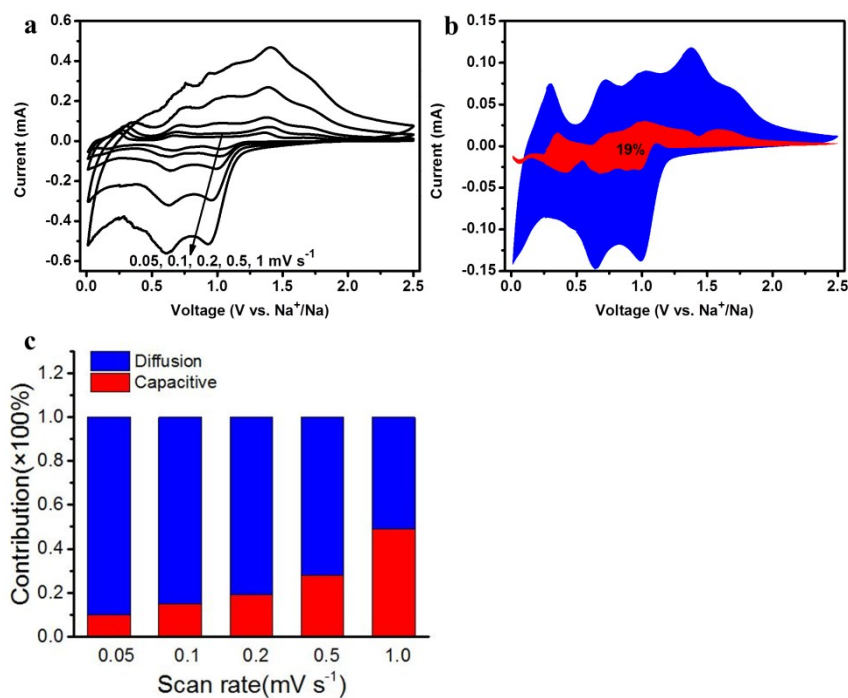

Figure S15 (a) CV curves of SnS/3DNG obtained at different scan rates; (b) capacitive (red) and diffusion-controlled (blue) contributions to charge storage of SnS/3DNG at 0.2 mVs<sup>-1</sup>; (c) normalized contribution ratio of capacitive (red) and diffusion-controlled (blue) capacities at different scan rates.

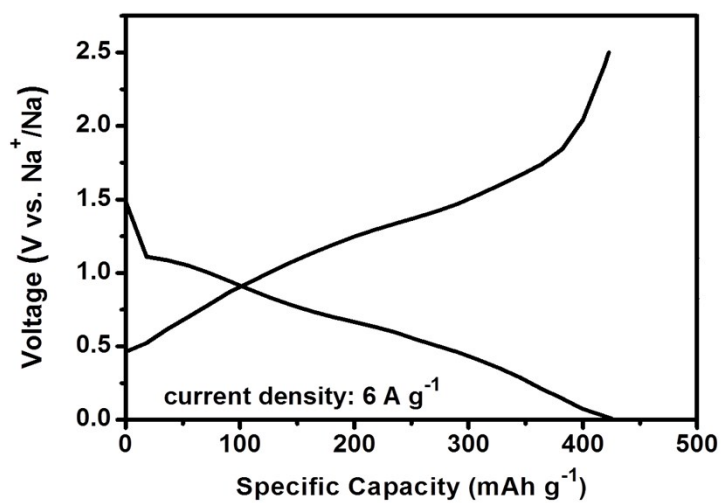

Figure S16 The charge-discharge profile of SnS/3DNG anode at  $6 \text{ A g}^{-1}$ , showing a plateaus at 1.1 V, followed by a long slope.

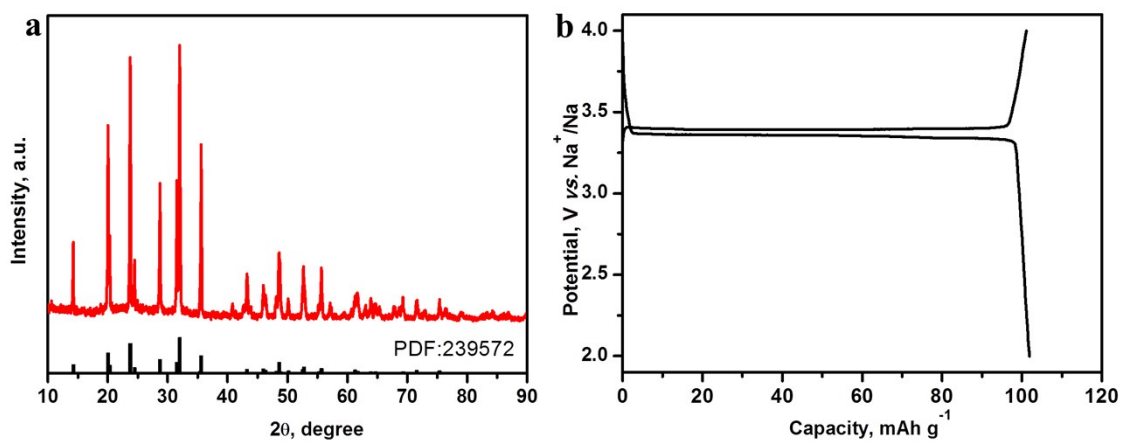

Figure S17 (a) XRD pattern of  $\text{Na}_3\text{V}_2(\text{PO}_4)_3/\text{C}$  composite and (b) charge/discharge profiles at current density of  $0.2 \text{ A g}^{-1}$ .

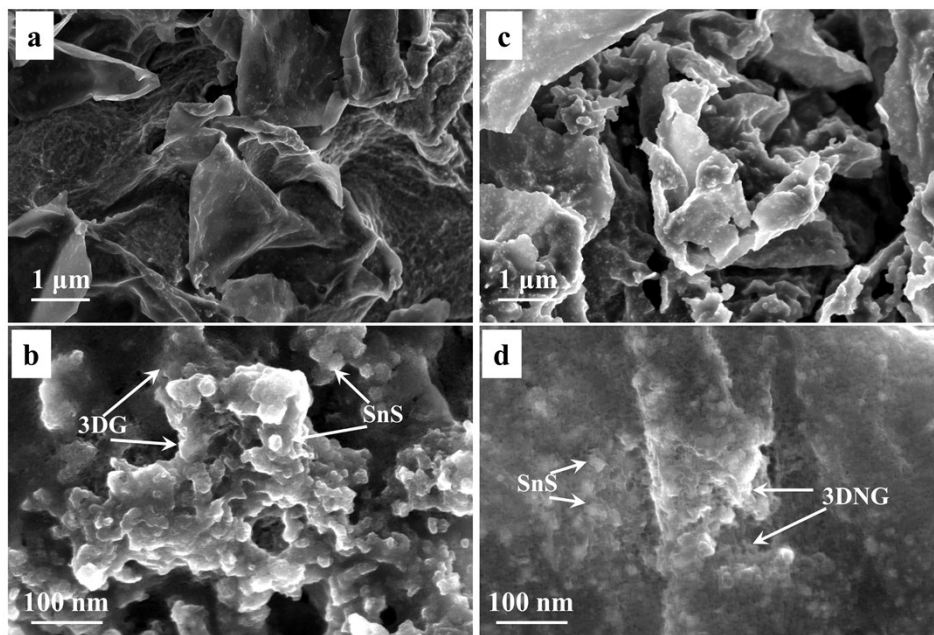

Figure S18 (a)-(b) SEM images of SnS/3DG and (c)-(d) SnS/3DNG after 1,000 cycles at  $2 \text{ A g}^{-1}$

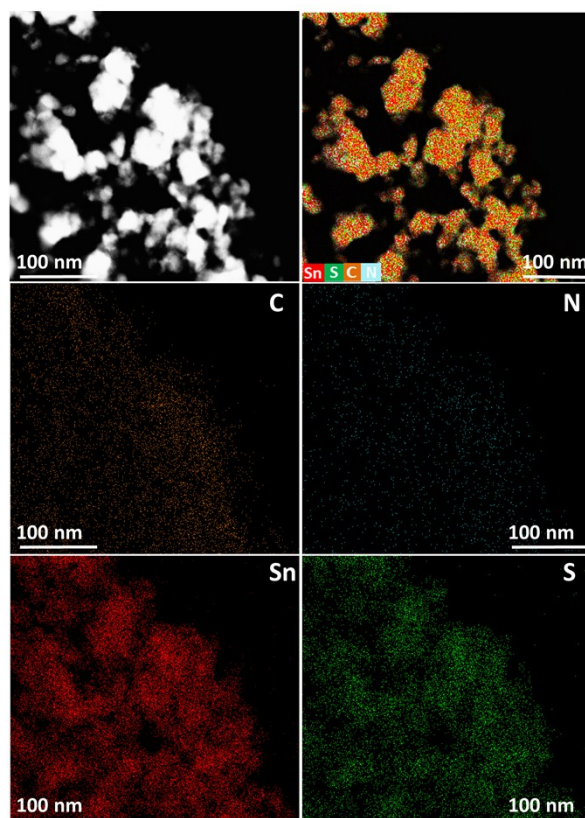

Fig. S19 TEM image and the corresponding C, N, S, and Sn elemental maps of the SnS/3DNG electrode after 1,000 charge/discharge cycles.

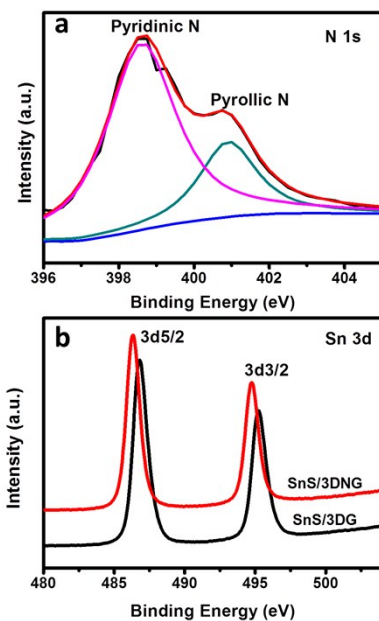

Fig. S20 High-resolution XPS spectra of N 1s and Sn 3d in SnS/3DNG. The negative shift of Sn 3d peaks in binding energy, indicating electron clouds still being biased from 3DNG to SnS after extensive cycling.
